# Supplementary material for: Where Do People Vape? Insights from Twitter Data
Source: PubMed Central journal article supplement (PMC6747114; doi:10.3390/ijerph16173056), 2019-08-23
Supplement: ijerph-16-03056-s001.pdf [file ijerph-16-03056-s001.pdf]

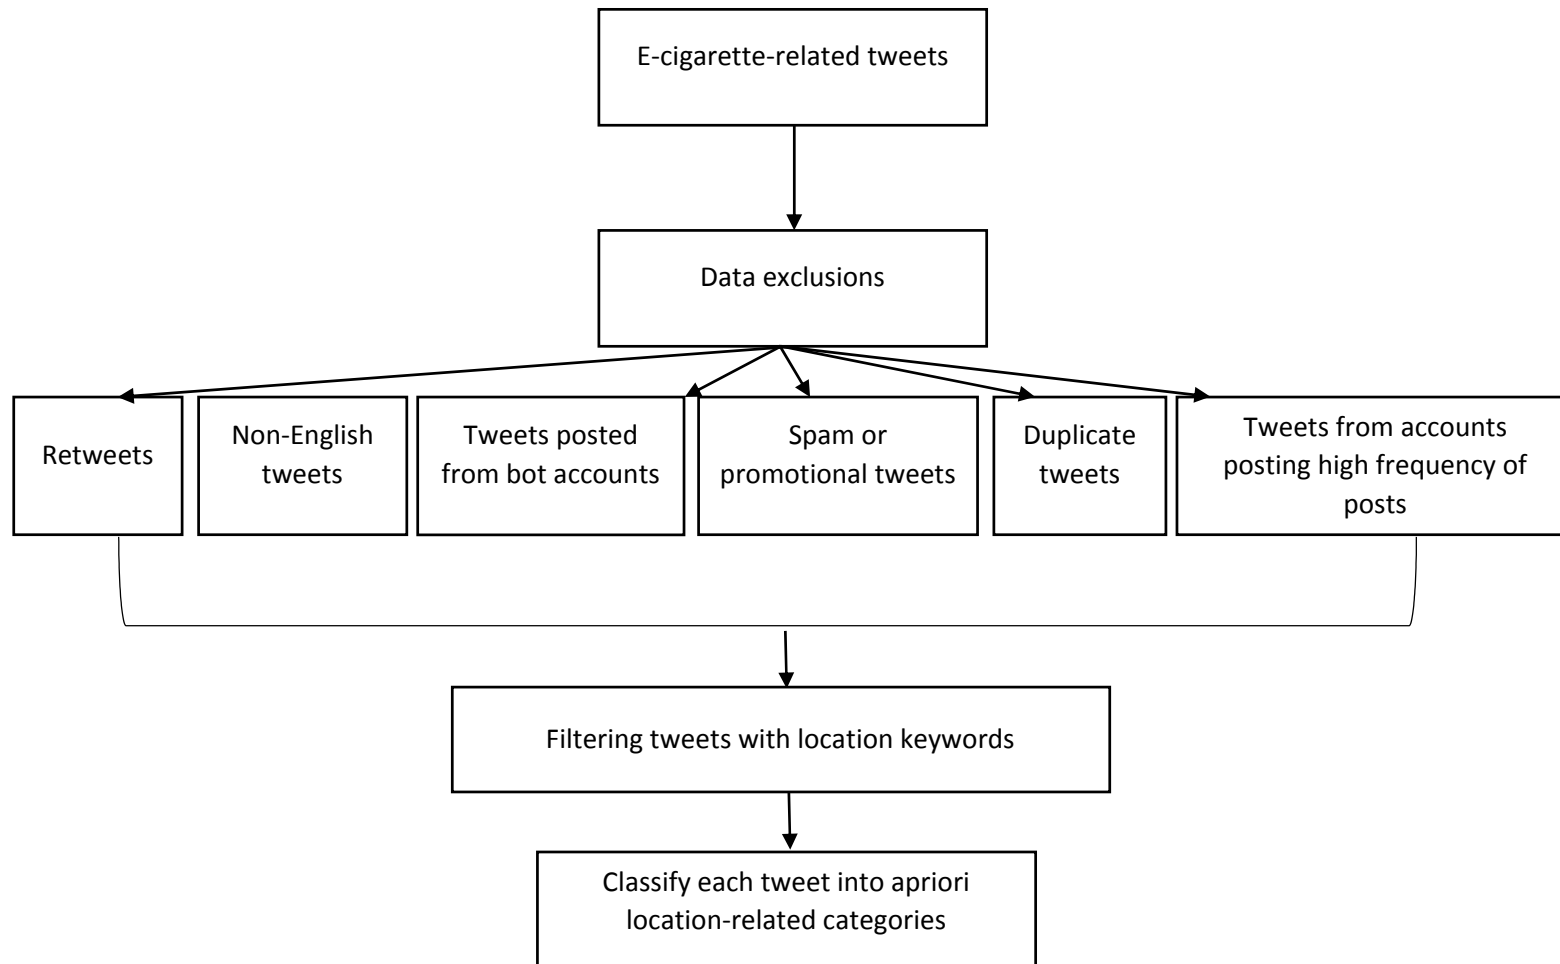

**Figure S1.** Data management procedures.
